# Supplementary material for: Comprehensive analysis of differences in N6-methyladenosine RNA methylomes in Helicobacter pylori infection
Source: Front Cell Dev Biol. 2023 Jun 7;11:1136096. doi: 10.3389/fcell.2023.1136096 (PMC10289286; doi:10.3389/fcell.2023.1136096)
Supplement: Supplementary file 2 [file Table6.xlsx]

## Sheet: Table S5
node_name	MCC	Degree	BottleNeck	EcCentricity	Closeness
EP300	43	44	74	0.05745	40.2845
STAT1	10	12	52	0.06566	31.6595
EGFR	10	20	18	0.06566	29.3929
DAG1	10	14	15	0.02329	9.66667
PAK2	7	8	15	0.02329	8.08333
NR3C1	22	14	11	0.06566	32.0762
FOXO3	12	16	11	0.05745	30.7679
PIK3R3	3	6	10	0.05745	22.4131
SMARCA4	32	22	9	0.05745	32.5512
PI4KA	3	6	9	0.05107	19.3992
SMARCC1	9	10	8	0.05745	26.1345
SNAP29	10	12	7	0.04596	18.5016
CHD3	4	8	7	0.05107	27.4575
PCNT	2	4	6	0.04596	21.1135
CLIP1	4	8	5	0.04178	18.4877
GLI3	4	8	5	0.05107	26.8909
TNRC6B	3	6	5	0.05107	27.0242
HYOU1	2	4	5	0.01553	3
PABPC1	5	10	4	0.04596	22.3063
TRADD	4	8	4	0.05745	23.6441
WWC1	3	6	4	0.01863	7.48333
RAC3	2	4	4	0.01863	6.53333
NSF	10	10	3	0.04178	16.2556
ABI2	3	6	3	0.01553	6.06667
CALM2	2	4	3	0.01863	2
PPP1R3B	2	4	3	0.01863	2
PPP1R12C	2	4	3	0.01863	2
EIF4ENIF1	2	4	3	0.01863	2
GTF2A1	12	8	2	0.05745	27.8845
TNRC6C	4	8	2	0.05107	27.5242
DNMT1	4	8	2	0.05107	23.9504
SETD7	3	6	2	0.05107	23.0171
MDC1	3	6	2	0.05107	23.2075
VPS39	3	6	2	0.0383	13.5843
RPP21	3	6	2	0.02484	3
CUL4A	2	4	2	0.05107	25.3075
TADA3	2	4	2	0.05107	25.3075
PITX2	2	4	2	0.05107	25.3075
TCF7L2	2	4	2	0.05107	25.3075
KIAA0586	2	4	2	0.04596	19.873
ILF3	2	4	2	0.04178	17.1985
MLST8	2	4	2	0.0383	14.9489
FBXW7	2	4	2	0.05107	25.8075
AMOTL1	2	4	2	0.01553	5.78333
HSPA12A	2	4	2	0.01035	2.83333
CANX	2	4	2	0.01035	2.83333
URB1	2	4	2	0.01242	2.5
RBM19	2	4	2	0.01242	2.5
STX17	8	8	1	0.04178	15.7556
CTCF	8	8	1	0.05107	27.2242
BRD4	8	8	1	0.05107	27.2242
GOSR2	6	6	1	0.04178	15.0889
GIT2	6	6	1	0.02329	7.25
LAMA3	6	6	1	0.02329	7.25
ADAM17	4	6	1	0.05745	21.4893
ADAM10	4	6	1	0.05745	21.4893
MITF	4	6	1	0.05107	26.7242
JAG1	3	6	1	0.05745	21.6441
TRIM25	2	4	1	0.05745	22.3107
TRAF3	2	4	1	0.05107	18.204
REST	2	4	1	0.05107	25.8075
GATAD2A	2	4	1	0.05107	25.7409
GAB2	2	4	1	0.05745	21.1631
CNOT6	2	4	1	0.04596	20.6397
PTCH1	2	4	1	0.04596	19.7064
GLI2	2	4	1	0.04596	19.7064
THAP7	2	4	1	0.04596	16.2516
VPS53	2	4	1	0.04178	14.5889
POMK	2	4	1	0.01863	6.4
DPM3	2	4	1	0.01863	6.4
WIPF1	2	4	1	0.01331	4.85952
WIPF2	2	4	1	0.01331	4.85952
RPS17	2	4	1	0.01242	2.5
RPS9	2	4	1	0.01242	2.5
AGPAT4	2	4	1	0.01863	2
AGPAT3	2	4	1	0.01863	2
PHF5A	2	4	1	0.01863	2
SF3B2	2	4	1	0.01863	2
LPIN1	2	4	1	0.01863	2
MRPS28	2	4	1	0.01863	2
MRPL57	2	4	1	0.01863	2
SF3A1	2	4	1	0.01863	2
MRPS23	2	4	1	0.01863	2
HIPK2	1	2	1	0.05107	24.6409
SPEN	1	2	1	0.05107	24.6409
MEF2A	1	2	1	0.05107	24.6409
CEBPD	1	2	1	0.05107	20.9671
SH3KBP1	1	2	1	0.05745	20.0726
NEDD4L	1	2	1	0.05745	20.0726
ERRFI1	1	2	1	0.05745	20.0726
KIAA0226	1	2	1	0.05745	20.0726
IGF2BP2	1	2	1	0.04596	18.573
RNF111	1	2	1	0.04596	18.573
TADA2B	1	2	1	0.04596	18.573
ZFHX3	1	2	1	0.04596	18.573
JARID2	1	2	1	0.04596	17.5933
TNFRSF10A	1	2	1	0.05107	17.5373
PIDD1	1	2	1	0.05107	17.5373
TCF20	1	2	1	0.04596	17.3325
NSD1	1	2	1	0.04596	17.2004
STAU1	1	2	1	0.04178	16.5318
C2CD3	1	2	1	0.04178	15.508
MAPRE2	1	2	1	0.0383	14.2822
TTL	1	2	1	0.0383	14.2822
TAF15	1	2	1	0.0383	13.7504
FKBP8	1	2	1	0.03536	12.2247
UBXN6	1	2	1	0.03536	10.9168
SNTB1	1	2	1	0.01863	5.9
PTPN14	1	2	1	0.01553	5.11667
AMOTL2	1	2	1	0.01331	4.31905
NUP188	1	2	1	0.00776	2.08333
KDSR	1	2	1	0.00776	2.08333
TARBP2	1	2	1	0.01242	2
MDN1	1	2	1	0.00828	1.83333
KRI1	1	2	1	0.00828	1.83333
MBP	1	2	1	0.00932	1.5
CAMK1D	1	2	1	0.00932	1.5
PPP1R3D	1	2	1	0.00932	1.5
MPRIP	1	2	1	0.00932	1.5
MFHAS1	1	2	1	0.00932	1.5
ROCK2	1	2	1	0.00932	1.5
GFER	1	2	1	0.00932	1.5
ALMS1	1	2	1	0.00932	1.5
PARD3	1	2	1	0.01242	1
MAGI1	1	2	1	0.01242	1
GGT1	1	2	1	0.01242	1
ALDH4A1	1	2	1	0.01242	1
NDUFS7	1	2	1	0.01242	1
NDUFB2	1	2	1	0.01242	1
CEP78	1	2	1	0.01242	1
CEP250	1	2	1	0.01242	1
SCD5	1	2	1	0.01242	1
HSD17B12	1	2	1	0.01242	1
ZSCAN29	1	2	1	0.01242	1
KNDC1	1	2	1	0.01242	1
2022-09-05	1	2	1	0.01242	1
GP1BB	1	2	1	0.01242	1
C16orf59	1	2	1	0.01242	1
C14orf80	1	2	1	0.01242	1
HPS6	1	2	1	0.01242	1
HPS4	1	2	1	0.01242	1
STK39	1	2	1	0.01242	1
PHF12	1	2	1	0.01242	1
CDK14	1	2	1	0.01242	1
CDK13	1	2	1	0.01242	1
DSE	1	2	1	0.01242	1
CHST15	1	2	1	0.01242	1
IKZF4	1	2	1	0.01242	1
DNAJC22	1	2	1	0.01242	1
TYSND1	1	2	1	0.01242	1
LONP2	1	2	1	0.01242	1
TOR1AIP2	1	2	1	0.01242	1
PPAPDC3	1	2	1	0.01242	1
ZNF521	1	2	1	0.01242	1
PCBP4	1	2	1	0.01242	1
PEX16	1	2	1	0.01242	1
PEX11G	1	2	1	0.01242	1
PRKAR2A	1	2	1	0.01242	1
AKAP13	1	2	1	0.01242	1
SLX1B	1	2	1	0.01242	1
ERCC4	1	2	1	0.01242	1
